# Supplementary material
Source: ML conference proceedings conference paper supplement (https://openreview.net/forum?id=rGCabZfV3d)
Supplement: supplementary_material [file attachment]

## 387 6 Supplementary Material

388 In this section, more comparisons of captions and reconstructed images are provided, compared with  
 389 state-of-the-art brain decoding pipelines.

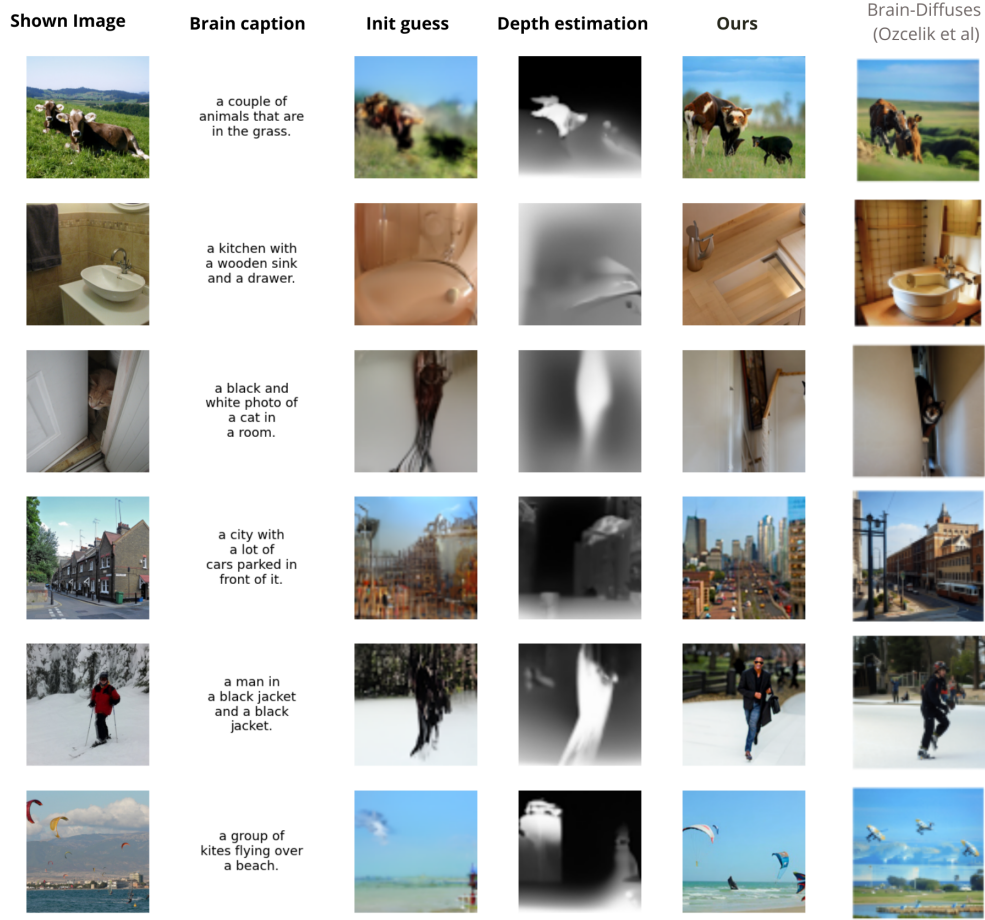

Figure A1: Comparison of our results (Columns 2-4) with the presented stimuli and other reconstruction works. The second column displays the caption derived from brain activity, the third column presents the initial guess image, the fourth column exhibits the depth-estimated images, and the fifth column showcases our final reconstruction. The last column demonstrates reconstructions from the recent BrainDiffuser work. All results are from subj01.

### 390 6.1 Ablation Study

391 To validate the contributions of our proposed extensions, we conducted ablation studies analyzing  
 392 the impact of the depth estimation component. As shown in the attached table, we compared three  
 393 model variations: 1) a baseline Stable Diffusion Img2Img pipeline using only the initial guess  
 394 image, 2) a Depth2Image pipeline using only the estimated depth map, and 3) our full approach  
 395 combining Stable Diffusion and ControlNet with both initial images and depth maps. Across low-  
 396 level metrics like PixelCorr and SSIM, the addition of depth information provided a consistent boost  
 397 in performance. This aligns with the hypothesis that depth cues aid in capturing spatial relationships  
 398 between objects and foreground-background segmentation. The full model with both initial images

| Shown Image                                                                        | Brain caption                                                  | Init guess                                                                         | Depth estimation                                                                   | Ours                                                                                | Brain-Diffuser<br>(Ozcelik et al)                                                    |
|------------------------------------------------------------------------------------|----------------------------------------------------------------|------------------------------------------------------------------------------------|------------------------------------------------------------------------------------|-------------------------------------------------------------------------------------|--------------------------------------------------------------------------------------|
|   | a large passenger jetliner flying past a blue sky.             |   |   |   |   |
|   | a man sitting on a chair                                       |   |   |   |   |
|   | a city street with a bus stop and a bus stop.                  |   |   |   |   |
|   | a young man holding a bowl of food.                            |   |   |   |   |
|   | a modern style kitchen with a double sink and a large cabinet. |   |   |   |   |
|  | a black and white photo of a clock tower on a beach.           |  |  |  |  |

Figure A2: Comparison of our results (Columns 2-4) with the presented stimuli and other reconstruction works. The second column displays the caption derived from brain activity, the third column presents the initial guess image, the fourth column exhibits the depth-estimated images, and the fifth column showcases our final reconstruction. The last column demonstrates reconstructions from the recent BrainDiffuser work. All results are from subj01.

and depth performed the best, indicating that the two components are complementary. Qualitatively, the depth maps appeared to enhance object boundaries and 3D perspective. These results suggest that incorporating depth estimates helps the model reconstruct more accurate and realistic representations of the visual stimuli. The depth component specifically seems to benefit lower-level aspects like shapes and spatial relationships, which are critical for humans to perceive two images as highly similar Hermann et al. [2020]. By guiding the image reconstruction process with depth information extracted from brain activity, our approach can generate images that better match human perceptual judgments.

| Ablation study         | Low level metrics |               |               | High level    |               |               |
|------------------------|-------------------|---------------|---------------|---------------|---------------|---------------|
| Variant                | PixCorr           | SSIM          | AlexNet (2)   | AlexNet (5)   | Inception     | CLIP          |
| Text + init            | 0.1204            | 0.1941        | 0.5815        | 0.7454        | 0.7974        | 0.8768        |
| Stable Diffusion depth | 0.3333            | 0.3106        | 0.8493        | 0.9654        | 0.8248        | 0.8778        |
| ControlNet             | <b>0.3379</b>     | <b>0.3178</b> | <b>0.8707</b> | <b>0.9674</b> | <b>0.8238</b> | <b>0.8788</b> |

Table 3: Ablation Study: Performance Metrics of Different Model Variants. Text + init is the plain Stable Diffusion Img2Img pipeline with initial guess image and captions predicted by the brain. Stable Diffusion depth is a variant pipeline that takes as input the initial guess image and captions and internally tries to estimate a depth map from the initial guess. ControlNet is external conditioning for the StableDiffusion Img2Img pipeline, so the inputs are the initial guess, the captions, and the depth maps estimated from the brain. This latter method is the one used in the paper and values (higher is better) show that this particular combination improves performance. Overall, this ablation study shows that including information about depth improves performances, particularly on low-level features.
